# Supplementary material for: A Plant-Based Cholesterol-Lowering Diet Score Correlates with Serum LDL-Cholesterol Levels
Source: MDPI journal article supplement (doi:10.3390/nu16040495), 2024-02-08
Supplement: s1 [file s1]

**Table S1.** Sensitivity analyses on serum cholesterol levels (mg/dL) according to cholesterol-lowering diet score excluding women with metabolic disorders.

| Dietary indicators<br>(Cut-off)                                 | n  | Serum lipid profile (mg/dL) - Median (Q <sub>1</sub> -Q <sub>3</sub> ) |                 |                 |                 |
|-----------------------------------------------------------------|----|------------------------------------------------------------------------|-----------------|-----------------|-----------------|
|                                                                 |    | Total cholesterol                                                      | HDL-C           | LDL-C           | Triglycerides   |
| Overall (n=292)                                                 |    |                                                                        |                 |                 |                 |
| Cholesterol-lowering diet score                                 |    |                                                                        |                 |                 |                 |
| 0-1                                                             | 80 | 193 (169-223)                                                          | 54 (46-65)      | 122 (101-151)   | 91 (69-124)     |
| 2                                                               | 97 | 186 (171-207)                                                          | 54 (45-70)      | 117 (97-137)    | 86 (61-127)     |
| 3                                                               | 68 | 181 (160-207)                                                          | 54 (46-61)      | 117 (99-132)    | 104 (82-142)    |
| 4-6                                                             | 47 | 177 (163-197)                                                          | 61 (53-73)      | 107 (91-124)    | 70 (55-92)      |
| Jonkhoeere-Tepstra test                                         |    | <i>p</i> < 0.01                                                        | <i>p</i> = 0.13 | <i>p</i> < 0.01 | <i>p</i> = 0.09 |
| Excluding women with diabetes mellitus (n=284)                  |    |                                                                        |                 |                 |                 |
| Cholesterol-lowering diet score                                 |    |                                                                        |                 |                 |                 |
| 0-1                                                             | 79 | 190 (168-222)                                                          | 54 (46-65)      | 121 (101-148)   | 91 (69-122)     |
| 2                                                               | 95 | 186 (171-207)                                                          | 54 (45-70)      | 117 (98-137)    | 86 (61-127)     |
| 3                                                               | 65 | 181 (159-207)                                                          | 53 (46-61)      | 116 (99-132)    | 103 (82-142)    |
| 4-6                                                             | 45 | 177 (167-198)                                                          | 61 (53-73)      | 107 (91-125)    | 70 (54-91)      |
| Jonkhoeere-Tepstra test                                         |    | <i>p</i> = 0.01                                                        | <i>p</i> = 0.11 | <i>p</i> = 0.01 | <i>p</i> = 0.09 |
| Excluding women with hyperglycemia (n=281)                      |    |                                                                        |                 |                 |                 |
| Cholesterol-lowering diet score                                 |    |                                                                        |                 |                 |                 |
| 0-1                                                             | 78 | 190 (166-221)                                                          | 54 (45-65)      | 121 (100-147)   | 89 (68-123)     |
| 2                                                               | 93 | 186 (171-207)                                                          | 54 (46-70)      | 116 (97-132)    | 86 (60-126)     |
| 3                                                               | 65 | 181 (159-207)                                                          | 53 (46-61)      | 114 (98-132)    | 102 (82-142)    |
| 4-6                                                             | 45 | 177 (167-198)                                                          | 61 (53-73)      | 107 (91-125)    | 70 (54-91)      |
| Jonkhoeere-Tepstra test                                         |    | <i>p</i> = 0.01                                                        | <i>p</i> = 0.10 | <i>p</i> = 0.01 | <i>p</i> = 0.09 |
| Excluding women with diabetes mellitus or hyperglycemia (n=280) |    |                                                                        |                 |                 |                 |
| Cholesterol-lowering diet score                                 |    |                                                                        |                 |                 |                 |
| 0-1                                                             | 78 | 190 (166-221)                                                          | 54 (45-65)      | 121 (100-147)   | 89 (68-123)     |
| 2                                                               | 93 | 186 (171-207)                                                          | 54 (46-70)      | 116 (97-137)    | 86 (60-126)     |
| 3                                                               | 64 | 181 (159-207)                                                          | 53 (46-61)      | 115 (99-132)    | 103 (82-142)    |
| 4-6                                                             | 45 | 177 (167-198)                                                          | 61 (53-73)      | 107 (91-125)    | 70 (54-91)      |
| Jonkhoeere-Tepstra test                                         |    | <i>p</i> = 0.02                                                        | <i>p</i> = 0.10 | <i>p</i> = 0.02 | <i>p</i> = 0.10 |
